# Supplementary material for: Health Care Needs of Iraqi Refugees Presenting to the Kurdish Red Crescent Clinics in the Al Hol Camp During 12 Months of on-going Conflict: A Cross-sectional Study. Short Title Complex Humanitarian Emergencies: Idp and Refugee Health Care Needs
Source: Research Square preprint supplement (doi:10.21203/rs.3.rs-1343070/v1), 2022-02-16
Supplement: Supplementary file 1 [file 8c1ec8e4a486e6c1a02bbaaa.docx]

**SUPPLEMENTARY ONLINE MATERIAL**

Supplementary Table 1 Age groups of Iraqi refugees Al Hol Camp March 2017-March 2018

Supplementary Figure 1 Total Iraqi camp population Al Hol March 2017- March 2018

Supplementary Figure 2 Age groups Iraqi refugees Al Hol Camp March 2017- March 2018.

Supplementary Figure 3 Number of Iraqi families in Al Hol camp March 2017- March 2018.

Supplementary Table 2: Daily Staffing Levels at Phase 1 & 4 Clinics in the Al Hol refugee camp

| **Profession** | **Phase 1**  **08.30-15.30** | **Phase 1**  **15.30-08.30** | **Phase 4**  **08.30-15.30** | **Phase 4**  **15.30-08.30** |
| --- | --- | --- | --- | --- |
| **Clinic Manager** | 1 | 0 | 1 | Closed |
| **Doctors** | 1 pediatric  1 Medical  1 Gynecologist *(Sat, Sun, Friday)* | 1 ER | 1 pediatric  1 Medical  1 Gynecologist | Closed |
| **Nurses** | 1 pediatric nurse  1 Medical nurse  1 Midwife | 1 midwife | 1 pediatric nurse  1 Medical nurse  1 Midwife | Closed |
| **Pharmacist** | 1 | 0 | 1 | Closed |
| **Paramedics** | 4 |  | 2 | Closed |
| **Laboratory Technician** | 1 | 0 | 0 | Closed |
| **Cleaners** | 2 | 0 |  | Closed |
| **M & E** | 1 | 0 |  | Closed |
| **Health Promotion Coordinator** | 1 | 0 |  | Closed |
| **Ambulance Drivers** | 2 | 1 | 0 | Closed |
| **Registration** | 2 | 1 | 1 | Closed |

Supplementary Figure 4: Type of consultations provided (phase 1)

Supplementary Figure 5: RTI consultations March 2017- March 2018

Supplementary Figure 6: Watery diarrhoea cases, indicating the vulnerable group of children < 5 years old.

Supplementary Figure 7: Urinary tract infection cases over 13 months

Supplementary Figure 8: Proportion of UTIs in male and female population.

Supplementary Figure 9: Vaginal discharge cases March 2017- March 2018.

Supplementary Figure 10: Skin diseases: total number of cases per month, and indicating cases in patients < 5 years old.

Supplementary Figure 11: Leishmaniosis cases detected in the camp March 2017- May 2017.

Supplementary Figure 12: Hypertension cases in male and females March 2017-March 2018.

Supplementary Figure 13: Non-communicable diseases consultations March 2017- March 2018.

Supplementary Figure 44: Cases of Anaemia in male and female camp residents March 2017- March 2018.
